# Supplementary material for: Isotopic homogenization and scrambling associated with oxygen isotopic exchange on hot platinum: studies on gas pairs (O2, CO2) and (CO, CO2)
Source: Royal Society of Chemistry journal article supplement (doi:10.1039/c6ra08286f), 2016-01-01
Supplement: c6ra08286f1.pdf [file c6ra08286f1.pdf]

## Supplementary Information for

### Isotopic homogenization and scrambling associated with oxygen isotopic exchange on hot platinum: studies on gas pairs (O<sub>2</sub>, CO<sub>2</sub>) and (CO, CO<sub>2</sub>)

K. Prasanna<sup>a</sup>, S.K. Bhattacharya<sup>a, c</sup>, Prosenjit Ghosh<sup>a, b</sup>, Sasadhar Mahata<sup>c, d</sup> and Mao-Chang Liang<sup>c</sup>

---

<sup>a.</sup> *Centre for Earth Sciences, Indian Institute of Science, Bangalore, India*

<sup>b.</sup> *Divecha Centre for Climate Change, Indian Institute of Science, Bangalore, India*

<sup>c.</sup> *Research Centre for Environmental Changes, Academia Sinica, Taipei, Taiwan*

<sup>d.</sup> *Xi'an Jiaotong University, Xi'an, China*

Table S1. The analytical data related to the catalysis induced exchange (for IISc experiments only) are given in supplementary Table 1 for O<sub>2</sub>-CO<sub>2</sub>

Table S2. The analytical data related to the catalysis induced exchange for δ<sup>18</sup>O change in case of CO-CO<sub>2</sub> exchange is given in Supplementary Table 2

Table S3. The analytical data related to the catalysis induced exchange for δ<sup>13</sup>C change in case of CO-CO<sub>2</sub> exchange is given in Supplementary Table 3

Table S1: Analytical data on isotope ratios of CO<sub>2</sub> and O<sub>2</sub> after heating in quartz tube at various temperatures with or without platinum. Linde CO<sub>2</sub> represents heated gas without platinum. δ'-values are in ‰ relative to VSMOW where δ'<sup>18</sup>O=1000\*ln(1+δ<sup>18</sup>O/1000) and δ'<sup>17</sup>O=1000\*ln(1+ δ<sup>17</sup>O/1000) are used instead of simple δ (Miller, 2002). Before and after indicate pre-exchange and post- exchange composition of the gases

| Sample                                                             | O <sub>2</sub> | CO <sub>2</sub> | Time (hrs) | Temp | CO <sub>2</sub> before δ' <sup>18</sup> O VSMOW | CO <sub>2</sub> after δ' <sup>18</sup> O VSMOW | O <sub>2</sub> before δ' <sup>18</sup> O VSMOW | O <sub>2</sub> after δ' <sup>18</sup> O VSMOW | O <sub>2</sub> before δ' <sup>17</sup> O VSMOW | O <sub>2</sub> after δ' <sup>17</sup> O VSMOW | <sup>18</sup> O change CO <sub>2</sub> | <sup>18</sup> O change O <sub>2</sub> | Δ <sub>47</sub> change |
|--------------------------------------------------------------------|----------------|-----------------|------------|------|-------------------------------------------------|------------------------------------------------|------------------------------------------------|-----------------------------------------------|------------------------------------------------|-----------------------------------------------|----------------------------------------|---------------------------------------|------------------------|
| CO <sub>2</sub> exchange with O <sub>2</sub> with platinum         |                |                 |            |      |                                                 |                                                |                                                |                                               |                                                |                                               |                                        |                                       |                        |
| 1                                                                  | 30.0           | 31.0            | 4          | 700  | 24.73                                           | 3.00                                           | -21.72                                         | 1.40                                          | -11.45                                         | 0.58                                          | -21.73                                 | 23.12                                 | -0.65                  |
| 2                                                                  | 22.1           | 20.0            | 2          | 700  | 24.75                                           | 2.96                                           | -21.38                                         | 1.24                                          | -11.24                                         | 0.46                                          | -21.79                                 | 22.62                                 | -0.47                  |
| 3                                                                  | 32.6           | 35.0            | 1          | 700  | 24.72                                           | 6.85                                           | -21.55                                         | -2.67                                         | -11.36                                         | -1.57                                         | -17.88                                 | 18.88                                 | -0.78                  |
| 4                                                                  | 47.1           | 48.8            | 22         | 700  | 24.87                                           | 2.06                                           | -21.88                                         | 2.40                                          | -11.63                                         | 0.99                                          | -22.81                                 | 24.27                                 | -0.84                  |
| 5                                                                  | 31.8           | 28.1            | 2          | 700  | 24.68                                           | 1.95                                           | -21.88                                         | -0.09                                         | -11.54                                         | -0.30                                         | -22.74                                 | 21.78                                 | -0.86                  |
| 6                                                                  | 31.5           | 27.8            | 2          | 700  | 25.28                                           | 2.93                                           | -21.93                                         | 0.08                                          | -11.58                                         | -0.23                                         | -22.35                                 | 22.01                                 | -0.54                  |
| 7                                                                  | 31.0           | 27.8            | 2          | 700  | 24.85                                           | 4.44                                           | -21.66                                         | 0.30                                          | -11.46                                         | -0.12                                         | -20.42                                 | 21.96                                 | -0.49                  |
| 8                                                                  | 31.1           | 29.0            | 2          | 600  | 24.90                                           | 4.04                                           | -21.80                                         | -0.49                                         | -11.59                                         | -0.49                                         | -20.86                                 | 21.30                                 | -0.56                  |
| 9                                                                  | 30.8           | 28.7            | 2          | 600  | 24.84                                           | 3.22                                           | -21.90                                         | 0.16                                          | -11.62                                         | -0.22                                         | -21.62                                 | 22.06                                 | -0.74                  |
| 10                                                                 | 30.3           | 28.1            | 2          | 500  | 24.75                                           | 9.03                                           | -21.91                                         | -5.79                                         | -11.58                                         | -3.21                                         | -15.72                                 | 16.12                                 | -0.57                  |
| 11                                                                 | 30.3           | 27.9            | 2          | 350  | 24.78                                           | 22.80                                          | -21.90                                         | -20.04                                        | -11.60                                         | -11.07                                        | -1.98                                  | 1.86                                  | -0.43                  |
| 12                                                                 | 30.3           | 29.0            | 2          | 300  | 24.61                                           | 24.52                                          | -21.79                                         | -21.85                                        | -11.52                                         | -11.53                                        | -0.09                                  | -0.06                                 | -0.03                  |
| 13                                                                 | 30.4           | 27.6            | 2          | 800  | 24.90                                           | 2.02                                           | -21.91                                         | 0.75                                          | -11.59                                         | 0.12                                          | -22.88                                 | 22.66                                 | -0.70                  |
| 14                                                                 | 30.0           | 28.3            | 2          | 800  | 24.78                                           | 2.06                                           | -21.98                                         | 1.40                                          | -11.66                                         | 0.48                                          | -22.72                                 | 23.38                                 | -0.95                  |
| 15                                                                 | 30.2           | 28.5            | 2          | 300  | 24.70                                           | 24.45                                          | -22.05                                         | -21.46                                        | -11.63                                         | -11.34                                        | -0.25                                  | 0.60                                  | -0.45                  |
| 16                                                                 | 30.1           | 29.0            | 2          | 400  | 25.12                                           | 21.21                                          | -21.87                                         | -16.41                                        | -11.58                                         | -8.73                                         | -3.90                                  | 5.46                                  | -0.55                  |
| 17                                                                 | 30.1           | 29              | 2          | 600  | 24.39                                           | 4.95                                           | -21.90                                         | -2.88                                         | -11.59                                         | -1.73                                         | -19.44                                 | 19.01                                 | -0.64                  |
| 18                                                                 | 30.3           | 29              | 2          | 800  | 24.64                                           | 0.76                                           | -21.90                                         | 0.93                                          | -11.60                                         | 0.24                                          | -23.88                                 | 22.84                                 | -0.98                  |
| 19                                                                 | 29.5           | 29              | 2          | 700  | 24.55                                           | 1.48                                           | -21.86                                         | 0.11                                          | -11.55                                         | -0.21                                         | -23.07                                 | 21.97                                 | -0.96                  |
| CO <sub>2</sub> exchange with O <sub>2</sub> without platinum      |                |                 |            |      |                                                 |                                                |                                                |                                               |                                                |                                               |                                        |                                       |                        |
| 20 (no Pt)                                                         | 29.6           | 28.5            | 2          | 800  | 24.70                                           | 22.93                                          | -21.85                                         | -20.26                                        | -11.56                                         | -10.73                                        | -1.77                                  | 1.59                                  | 1.15                   |
| 21 (no Pt)                                                         | 29.5           | 28.3            | 2          | 700  | 24.74                                           | 24.50                                          | -21.88                                         | -21.52                                        | -11.59                                         | -11.41                                        | -0.24                                  | 0.36                                  | -0.57                  |
| CO <sub>2</sub> heated without O <sub>2</sub> and without platinum |                |                 |            |      |                                                 |                                                |                                                |                                               |                                                |                                               |                                        |                                       |                        |
| Linde CO <sub>2</sub>                                              |                |                 |            |      |                                                 |                                                |                                                |                                               |                                                |                                               |                                        |                                       |                        |
| 22 Heated gas                                                      | NA             | 50.0            | 5          | 1000 | 24.49                                           | 21.50                                          | NA                                             | NA                                            | NA                                             | NA                                            | -2.99                                  | NA                                    |                        |

Table S2: Analytical data on  $\delta^{18}\text{O}$  values (in ‰ relative to VSMOW) pertaining to CO-CO<sub>2</sub> exchange along with blank runs with/without platinum, before and after indicate Pre and Post Exchange compositions

| Sample                                            | CO <sub>2</sub> | CO   | Time (hrs) | Temp (°C) | CO <sub>2</sub> before         | CO <sub>2</sub> after          | Change in $\delta^{18}\text{O}$ | Change in $\delta^{18}\text{O}$ | CO before                      | CO after                       | Change in $\delta^{18}\text{O}$ |
|---------------------------------------------------|-----------------|------|------------|-----------|--------------------------------|--------------------------------|---------------------------------|---------------------------------|--------------------------------|--------------------------------|---------------------------------|
|                                                   | μmol            | μmol |            |           | $\delta^{18}\text{O}$<br>VSMOW | $\delta^{18}\text{O}$<br>VSMOW | CO <sub>2</sub>                 | mass adjusted                   | $\delta^{18}\text{O}$<br>VSMOW | $\delta^{18}\text{O}$<br>VSMOW | CO                              |
| CO_CO <sub>2</sub> _1                             | 19              | 38   | 4.0        | 530       | 24.68                          | -18.11                         | -42.79                          | -42.79                          | NM                             | NM                             | NM                              |
| CO_CO <sub>2</sub> _2                             | 19.2            | 35.7 | 4.5        | 770       | 24.35                          | -26.80                         | -51.15                          | -55.02                          | NM                             | NM                             | NM                              |
| CO_CO <sub>2</sub> _3                             | 25              | 34   | 15.0       | 700       | 24.90                          | -56.47                         | -81.37                          | -119.66                         | -328.80                        | -208.68                        | 120.12                          |
| CO_CO <sub>2</sub> _4                             | 45              | 34   | 15.5       | 700       | 24.84                          | -26.84                         | -51.68                          | -136.80                         | -328.80                        | -184.49                        | 144.31                          |
| CO_CO <sub>2</sub> _5                             | 28              | 46   | 25.0       | 700       | 24.86                          | -94.33                         | -119.20                         | -145.11                         | -328.80                        | -179.25                        | 149.55                          |
| CO_CO <sub>2</sub> _6                             | 27              | 44   | 1.0        | 700       | 24.72                          | 13.09                          | -11.63                          | -14.28                          | -328.80                        | -312.51                        | 16.29                           |
| Blank CO <sub>2</sub><br>(without CO, with Pt)_7  | 61              | NA   | 4.0        | 660       | 24.85                          | 24.87                          | -0.02                           | NA                              | NA                             | NA                             | NA                              |
| Blank CO<br>(without CO <sub>2</sub> , with Pt)_8 | NA              | 32.1 | 4.0        | 700       | NA                             | NA                             | NA                              | NA                              | -328.80                        | -330.10                        | -1.30                           |
| Blank CO <sub>2</sub><br>+ CO<br>(without Pt)_9   | 24              | 28   | 17.0       | 700       | 24.69                          | -16.29                         | -40.99                          | -70.26                          | -328.80                        | -255.77                        | 73.03                           |
| Blank CO <sub>2</sub><br>+ CO<br>(without Pt)_10  | 24              | 30   | 15.0       | 700       | 24.91                          | -16.11                         | -41.02                          | -65.63                          | -328.80                        | -261.82                        | 66.98                           |

Table S3: Analytical data on  $\delta^{13}\text{C}$  values (in ‰ relative to VPDB) pertaining to CO-CO<sub>2</sub> exchange on hot platinum along with blanks with or without platinum; before and after indicate pre and post-exchange compositions. Mass adjusted means multiplied by CO<sub>2</sub>/CO ratio

| Sample                                            | CO <sub>2</sub> | CO              | CO <sub>2</sub><br>before     | CO <sub>2</sub><br>after      | $\delta^{13}\text{C}$<br>change | CO<br>before                  | CO<br>after                   | $\delta^{13}\text{C}$<br>change |
|---------------------------------------------------|-----------------|-----------------|-------------------------------|-------------------------------|---------------------------------|-------------------------------|-------------------------------|---------------------------------|
|                                                   | $\mu\text{mol}$ | $\mu\text{mol}$ | $\delta^{13}\text{C}$<br>VPDB | $\delta^{13}\text{C}$<br>VPDB | Mass<br>adjusted                | $\delta^{13}\text{C}$<br>VPDB | $\delta^{13}\text{C}$<br>VPDB | in CO                           |
| CO_CO <sub>2</sub> _1                             | 19              | 38              | -3.8                          | -29.9                         | -13.1                           |                               |                               |                                 |
| CO_CO <sub>2</sub> _2                             | 19.2            | 35.7            | -4                            | -29.3                         | -13.7                           |                               |                               |                                 |
| CO_CO <sub>2</sub> _3                             | 25              | 34              | -3.7                          | -32                           | -20.8                           | -683.2                        | -670.6                        | 12.6                            |
| CO_CO <sub>2</sub> _4                             | 45              | 34              | -3.7                          | -21.2                         | -23.1                           | -683.2                        | -662.5                        | 20.7                            |
| CO_CO <sub>2</sub> _5                             | 28              | 46              | -3.7                          | -44.7                         | -25                             | -683.2                        | -669.2                        | 14                              |
| CO_CO <sub>2</sub> _6                             | 27              | 44              | -3.8                          | -14.7                         | -6.7                            | -683.2                        | -676.7                        | 6.5                             |
| Blank CO <sub>2</sub> (without CO,<br>with Pt)_7  | 61              | NA              | -3.7                          | -3.7                          | 0                               | NA                            | NA                            | NA                              |
| Blank CO (without CO <sub>2</sub> ,<br>with Pt)_8 | NA              | 32.1            | NA                            | NA                            | NA                              | -683.2                        | -680.3                        | 2.9                             |
| Blank CO <sub>2</sub> + CO<br>(without Pt)_9      | 24              | 28              | -3.8                          | -19.9                         | -13.9                           | -683.2                        | -679.3                        | 3.9                             |
| Blank CO <sub>2</sub> + CO<br>(without Pt)_10     | 24              | 30              | -3.7                          | -22.8                         | -15.3                           | -683.2                        | -673.1                        | 10.1                            |
